# Supplementary material
Source: PubMed Central journal article supplement (PMC2734477)
Supplement: NIHMS130719-supplement-supplement_1.pdf [file NIHMS130719-supplement-supplement_1.pdf]

**Supplementary Materials**

| Table E1. Characteristics of eligible and ineligible aMCI subjects at earliest aMCI diagnosis with concomitant MRI |                                                         |                                            |                                         |                                                                   |                                            |
|--------------------------------------------------------------------------------------------------------------------|---------------------------------------------------------|--------------------------------------------|-----------------------------------------|-------------------------------------------------------------------|--------------------------------------------|
|                                                                                                                    | aMCI subjects without qualifying no. of scans (n = 344) | aMCI patients with qualifying no. of scans |                                         | P-value                                                           |                                            |
|                                                                                                                    |                                                         | Subjects included in analysis (n= 69)      | Subjects excluded from analysis (n= 67) | Subjects in analyses vs. subjects without qualifying no. of scans | Subjects in analyses vs. excluded subjects |
| No. of women (%)                                                                                                   | 172 (50)                                                | 33 (48)                                    | 24 (36)                                 | 0.74                                                              | 0.16                                       |
| Mean (SD) age, y                                                                                                   | 78.3 (9.7)                                              | 77.0 (6.2)                                 | 74.4 (8.7)                              | 0.06                                                              | 0.10                                       |
| Mean (SD) number of years of education                                                                             | 13.8 (3.4)                                              | 14.2 (3.4)                                 | 14.0 (3.5)                              | 0.29                                                              | 0.62                                       |
| No. of APOE ε4 carriers (%)                                                                                        | 114 (47)                                                | 41 (59)                                    | 26 (40)                                 | 0.07                                                              | 0.02                                       |
| Median (min., max.) summed learning over trials 1–5 from AVLT                                                      | 27 (8, 48)                                              | 27 (4, 43)                                 | 28 (8, 44)                              | 0.54                                                              | 0.37                                       |
| Median (min., max.) CDR sum of boxes                                                                               | 0.5 (0.0, 6.5)                                          | 0.5 (0.0, 3.5)                             | 0.5 (0.0, 5.0)                          | 0.78                                                              | 0.96                                       |
| Median (min., max.) MMSE                                                                                           | 27 (18, 30)                                             | 26 (18, 30)                                | 26 (19, 30)                             | 0.11                                                              | 0.64                                       |
| Median (min., max.) WMS logical memory II, paragraph recall                                                        | 4 (0, 30)                                               | 3 (0, 17)                                  | 5 (0, 26)                               | 0.048                                                             | 0.10                                       |
| Median (min., max.) WAIS-R block design                                                                            | 6 (1, 14)                                               | 7 (1, 17)                                  | 7 (4, 14)                               | 0.04                                                              | 0.96                                       |
| Median (min., max.) WAIS-R picture completion                                                                      | 5 (1, 14)                                               | 6 (1, 11)                                  | 6 (3, 14)                               | 0.28                                                              | 0.57                                       |

The piecewise-linear mixed effects model was expressed as

$$y_{ij} = \beta_0 + \beta_1 TIV_i + \beta_2 Male_i + \beta_3 IndexAge_i + \beta_4 Time_{ij} + \beta_5 h(Time_{ij}) + b_{0i} + e_{ij}$$

Here  $y$  represents either volume or cognitive test score with  $ij$  denoting the value for the  $i$ th subject at the  $j$ th timepoint.  $Male_i$  is 1 if the  $i$ th subject is male and zero otherwise.  $IndexAge_i$  is the age of the  $i$ th subject at the time of the index scan.  $Time_{ij}$  is the years from the index scan for the  $i$ th subject at the  $j$ th timepoint. For pre-index times,  $h(Time_{ij})$  is zero while for post-index times,  $h(Time_{ij}) = Time_{ij}$ , thus accommodating a change in slope at time zero. The random intercept  $b_{0i}$  is normally distributed with mean zero and standard deviations  $\sigma_0$ . The random errors  $e_{ij}$  are normally distributed with mean zero and standard deviation  $\sigma_e$ . The correlation between  $e_{ij}$  and  $e_{ik}$  is modeled as  $\exp(-(x_i/a)^2)$  where  $x_i$  is the time between observation  $j$  and observation  $k$  for subject  $i$  and  $a$  is a parameter estimated from the data.

The age-based model was parameterized as

$$y_{ij} = \beta_1 TIV_i + \beta_2 Male_i + \beta_3 CN_i + \beta_4 (CN_i \times Age_{ij}) + \beta_5 (CN_i \times Age_{ij}^2) + \beta_6 aMCI_i + \beta_7 (aMCI_i \times Age_{ij}) + \beta_8 (aMCI_i \times Age_{ij}^2) + \beta_9 aMCI_i + \beta_{10} (aMCI_i \times Age_{ij}) + \beta_{11} (aMCI_i \times Age_{ij}^2) + b_{0i} + e_{ij}$$

Here the notation is similar to above but with  $CN_i$ ,  $aMCI-s_i$ , and  $aMCI-p_i$  representing group indicators that are 1 if the  $i$ th subject belongs to the respective group and zero otherwise. In this model, each group has its own intercept term, linear age term, and quadratic age term and all three groups share a common TIV and sex term. The results from these models are shown in tables A1 and A2. For the APOE  $\epsilon 4$  analysis, a similar model was fit except the CN subjects were omitted and the three-level group variable was replaced with a binary variable representing carriers and non-carriers.

| Table E2. aMCI Progressors. Estimates for pre-index date rate, post-index date rate, and rate change of AVLT sum of words learned of trials 1 to 5, CDR sum of boxes, and MMSE based on piecewise-linear mixed effects models |          |              |          |
|-------------------------------------------------------------------------------------------------------------------------------------------------------------------------------------------------------------------------------|----------|--------------|----------|
|                                                                                                                                                                                                                               | Estimate | 95% CI       | P-value* |
| Change in AVLT summed learning trials 1-5                                                                                                                                                                                     |          |              |          |
| Before index date                                                                                                                                                                                                             | -1.7     | -2.0 to -1.3 | <0.001   |
| After index date                                                                                                                                                                                                              | -1.1     | -1.6 to -0.6 | <0.001   |
| Rate change                                                                                                                                                                                                                   | 0.6      | -0.2 to +1.3 | 0.13     |
| Change in CDR sum of boxes                                                                                                                                                                                                    |          |              |          |
| Before index date                                                                                                                                                                                                             | +0.5     | +0.3 to +0.7 | <0.001   |
| After index date                                                                                                                                                                                                              | +1.8     | +1.6 to +1.9 | <0.001   |
| Rate change                                                                                                                                                                                                                   | +1.3     | +1.0 to +1.6 | <0.001   |
| Change in MMSE                                                                                                                                                                                                                |          |              |          |
| Before index date                                                                                                                                                                                                             | -0.5     | -0.7 to -0.2 | <0.001   |
| After index date                                                                                                                                                                                                              | -2.0     | -2.4 to -1.7 | <0.001   |
| Rate change                                                                                                                                                                                                                   | -1.5     | -2.0 to -1.0 | <0.001   |
| Note: Estimates are adjusted for education, sex, and age at the time of the index scan                                                                                                                                        |          |              |          |
| CI, confidence interval                                                                                                                                                                                                       |          |              |          |
| * Based on Wald test testing whether coefficient is zero                                                                                                                                                                      |          |              |          |

| Table E3. Age-based mixed model estimates for ventricular volume |                  |                |         |
|------------------------------------------------------------------|------------------|----------------|---------|
| Term                                                             | Coefficient (SE) | 95% CI         | P-value |
| TIV, liters                                                      | 66.7 (21.0)      | 25 to 108      | 0.002   |
| Male sex                                                         | -2.89 (5.91)     | -15 to 9       | 0.63    |
| Cognitively normal                                               |                  |                |         |
| Intercept                                                        | -134.1 (64.7)    | -262 to -6     | 0.04    |
| Age                                                              | 0.942 (1.45)     | -1.9 to 3.8    | 0.52    |
| Age <sup>2</sup>                                                 | 0.0032 (0.0092)  | -0.01 to 0.002 | 0.73    |
| aMCI-stable                                                      |                  |                |         |
| Intercept                                                        | -484.5 (157.9)   | -797 to -172   | 0.003   |
| Age                                                              | 8.92 (3.78)      | 1.5 to 16.3    | 0.02    |
| Age <sup>2</sup>                                                 | -0.0400 (0.0228) | -0.08 to 0.005 | 0.08    |
| aMCI-progressor                                                  |                  |                |         |
| Intercept                                                        | -545.0 (71.9)    | -687 to -403   | <0.001  |
| Age                                                              | 9.43 (1.65)      | 6.2 to 12.7    | <0.001  |
| Age <sup>2</sup>                                                 | -0.0360 (0.0103) | -0.06 to -0.02 | <0.001  |
| SE, standard error for coefficient                               |                  |                |         |
| CI, confidence interval                                          |                  |                |         |

| Table E4. Age-based mixed model estimates for whole brain |                  |                |         |
|-----------------------------------------------------------|------------------|----------------|---------|
| Term                                                      | Coefficient (SE) | 95% CI         | P-value |
| TIV, liters                                               | 674.1 (54.5)     | 566 to 782     | <0.001  |
| Male sex                                                  | 29.18 (15.29)    | -1.1 to 59.5   | 0.06    |
| Cognitively normal                                        |                  |                |         |
| Intercept                                                 | 494.2 (178.4)    | 141 to 848     | 0.007   |
| Age                                                       | -1.21 (4.07)     | -9.2 to 6.8    | 0.77    |
| Age <sup>2</sup>                                          | -0.0179 (0.0256) | -0.07 to 0.03  | 0.48    |
| aMCI-stable                                               |                  |                |         |
| Intercept                                                 | 1512.3 (465.1)   | 591 to 2434    | 0.002   |
| Age                                                       | -24.87 (11.14)   | -47 to -3      | 0.03    |
| Age <sup>2</sup>                                          | 0.1187 (0.0669)  | -0.013 to 0.25 | 0.08    |
| aMCI-progressor                                           |                  |                |         |
| Intercept                                                 | 1747.9 (194.6)   | 1362 to 2134   | <0.001  |
| Age                                                       | -29.12 (4.50)    | -38 to -20     | <0.001  |
| Age <sup>2</sup>                                          | 0.1272 (0.0282)  | 0.07 to 0.18   | <0.001  |
| SE, standard error for coefficient                        |                  |                |         |
| CI, confidence interval                                   |                  |                |         |

| Term                               | Coefficient (SE) | 95% CI         | P-value |
|------------------------------------|------------------|----------------|---------|
| Education, years                   | 0.5 (0.2)        | 0.02 to 0.9    | 0.04    |
| Male sex                           | -3.5 (1.4)       | -6.3 to -0.7   | 0.01    |
| Cognitively normal                 |                  |                |         |
| Intercept                          | -81.0 (43.2)     | -166 to 4.5    | 0.06    |
| Age                                | 2.9 (1.1)        | 0.7 to 5.0     | 0.008   |
| Age <sup>2</sup>                   | -0.02 (0.01)     | -0.03 to 0.00  | 0.010   |
| aMCI-stable                        |                  |                |         |
| Intercept                          | -134.0 (107.7)   | -347 to 79     | 0.22    |
| Age                                | 4.3 (2.6)        | -0.8 to 9.4    | 0.10    |
| Age <sup>2</sup>                   | -0.03 (0.02)     | -0.06 to 0.003 | 0.07    |
| aMCI-progressor                    |                  |                |         |
| Intercept                          | 50.7 (60.3)      | -68 to 170     | 0.40    |
| Age                                | 0.3 (1.5)        | -2.7 to 3.3    | 0.86    |
| Age <sup>2</sup>                   | -0.01 (0.01)     | -0.03 to 0.01  | 0.37    |
| SE, standard error for coefficient |                  |                |         |
| CI, confidence interval            |                  |                |         |

| Table E6. Age-based mixed model estimates for CDR sum of boxes* |                  |                |         |
|-----------------------------------------------------------------|------------------|----------------|---------|
| Term                                                            | Coefficient (SE) | 95% CI         | P-value |
| Education, years                                                | -0.15 (0.19)     | -0.5 to 0.2    | 0.41    |
| Male sex                                                        | -1.9 (1.3)       | -4.4 to 0.6    | 0.14    |
| aMCI-stable                                                     |                  |                |         |
| Intercept                                                       | -5.7 (64.4)      | -134 to 123    | 0.93    |
| Age                                                             | 0.20 (1.6)       | -2.9 to 3.3    | 0.90    |
| Age <sup>2</sup>                                                | -0.001 (0.009)   | -0.02 to 0.02  | 0.92    |
| aMCI-progressor                                                 |                  |                |         |
| Intercept                                                       | -61.1 (30.1)     | -121 to -0.99  | 0.046   |
| Age                                                             | 0.76 (0.75)      | -0.7 to 2.2    | 0.31    |
| Age <sup>2</sup>                                                | 0.001 (0.005)    | -0.008 to 0.01 | 0.78    |
| * The CN group is excluded from this model fit                  |                  |                |         |
| SE, standard error for coefficient                              |                  |                |         |
| CI, confidence interval                                         |                  |                |         |

| Table E7. Age-based mixed model estimates for MMSE |                  |                 |         |
|----------------------------------------------------|------------------|-----------------|---------|
| Term                                               | Coefficient (SE) | 95% CI          | P-value |
| Education, years                                   | 0.16 (0.09)      | -0.02 to 0.3    | 0.08    |
| Male sex                                           | 0.37 (0.56)      | -0.7 to 1.5     | 0.51    |
| Cognitively normal                                 |                  |                 |         |
| Intercept                                          | 16.8 (25.3)      | -33 to 67       | 0.51    |
| Age                                                | 0.27 (0.63)      | -1.0 to 1.5     | 0.68    |
| Age <sup>2</sup>                                   | -0.002 (0.004)   | -0.01 to 0.01   | 0.65    |
| aMCI-stable                                        |                  |                 |         |
| Intercept                                          | -7.2 (61.2)      | -128 to 114     | 0.91    |
| Age                                                | 0.7 (1.5)        | -2.1 to 3.6     | 0.63    |
| Age <sup>2</sup>                                   | -0.004 (0.009)   | -0.02 to 0.01   | 0.65    |
| aMCI-progressor                                    |                  |                 |         |
| Intercept                                          | -21.0 (32.2)     | -85 to 43       | 0.52    |
| Age                                                | 1.7 (0.8)        | 0.06 to 3.3     | 0.04    |
| Age <sup>2</sup>                                   | -0.01 (0.005)    | -0.02 to -0.004 | 0.006   |
| SE, standard error for coefficient                 |                  |                 |         |
| CI, confidence interval                            |                  |                 |         |
